# Supplementary material for: Probing the microstructure and deformation mechanism of an FeCoCrNiAl0.5 high entropy alloy during nanoscratching: a combined atomistic and physical model study
Source: Royal Society of Chemistry journal article supplement (doi:10.1039/d4ra02422b), 2024-01-01
Supplement: d4ra02422b1.pdf [file d4ra02422b1.pdf]

## Supplementary information

### Probing microstructure and deformation mechanism of FeCoCrNiAl<sub>0.5</sub> high entropy alloy during nanoscratch: A combined atomistic and physical model study

Yong Zhang<sup>a,b\*</sup>, Wenfei Yang<sup>b</sup>, Jing Peng<sup>c\*</sup>, Andong Wang<sup>b</sup>, Weijie Fan<sup>b</sup>, Jia Li<sup>c</sup>

<sup>a</sup> State Key Laboratory of Powder Metallurgy, Central South University, Changsha, 410083, PR China

<sup>b</sup> Naval Aviation University Qingdao Campus, Qingdao, 266041, PR China

<sup>c</sup> State Key Laboratory of Advanced Design and Manufacturing for Vehicle Body, College of Mechanical and Vehicle Engineering, Hunan University, Changsha, 410082, PR China

\* Corresponding author. E-mail address: zhangyong308@126.com, and jingpeng@hnu.edu.cn.

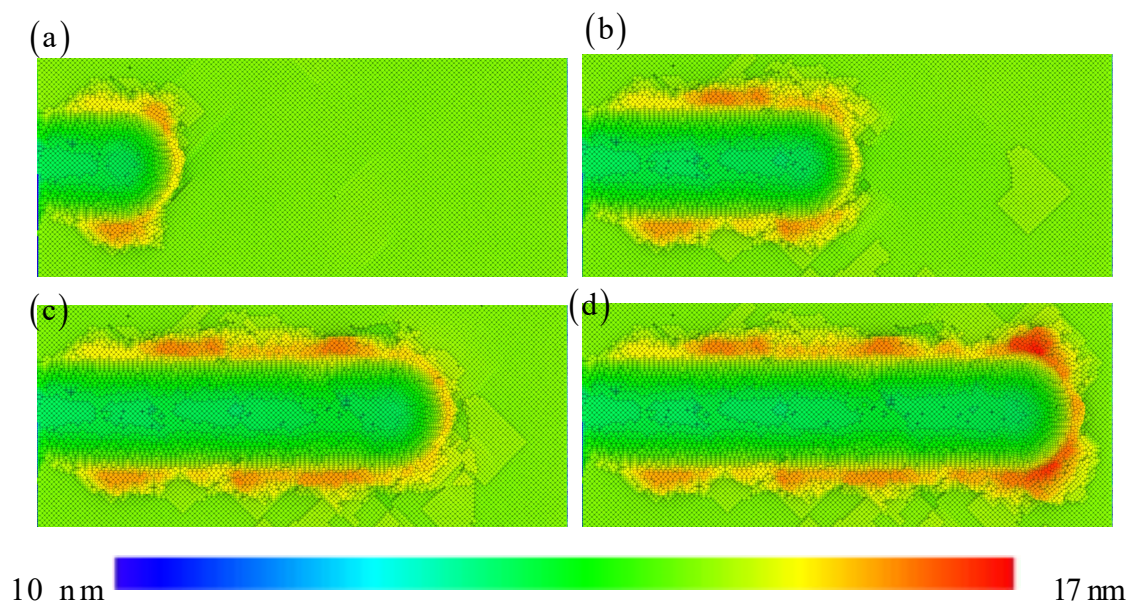

**Figure S1** The surface morphology of FeCoCrNiAl<sub>0.5</sub> HEA with different scratching distances: (a) 10 nm, (b) 20 nm, (c) 30 nm, and (d) 36 nm. Atoms are colored according to the atomic height.

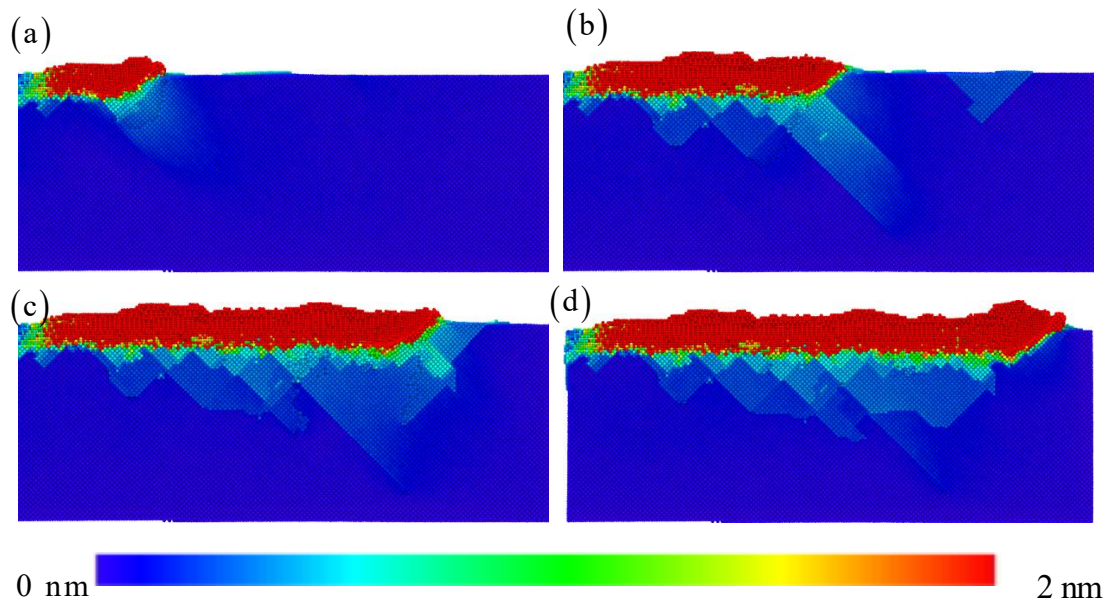

**Figure S2** The displacement distribution in the pure Ni for the scratching distance: (a) 10 nm, (b) 20 nm, (c) 30 nm, and (d) 36 nm.

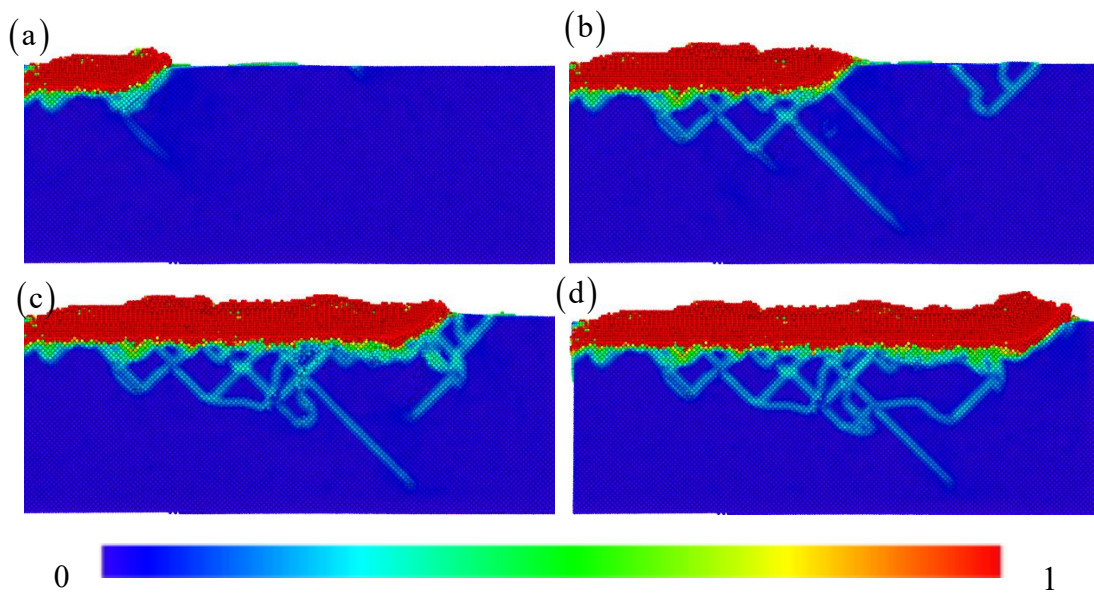

**Figure S3** The strain distribution in the pure Ni for the scratching distance: (a) 10 nm, (b) 20 nm, (c) 30 nm, and (d) 36 nm.



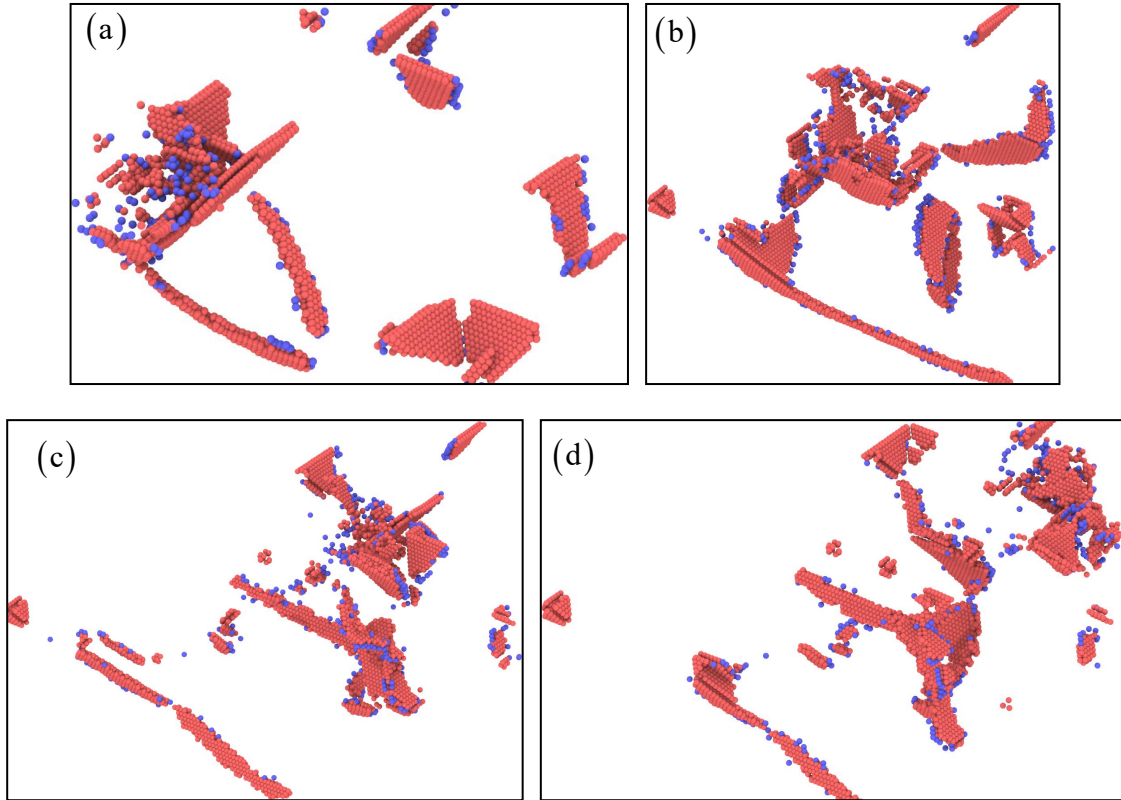

**Figure S4** The evolution of instantaneous microstructure in the pure Ni for the scratching distance: (a) 10 nm, (b) 20 nm, (c) 30 nm, and (d) 36 nm.

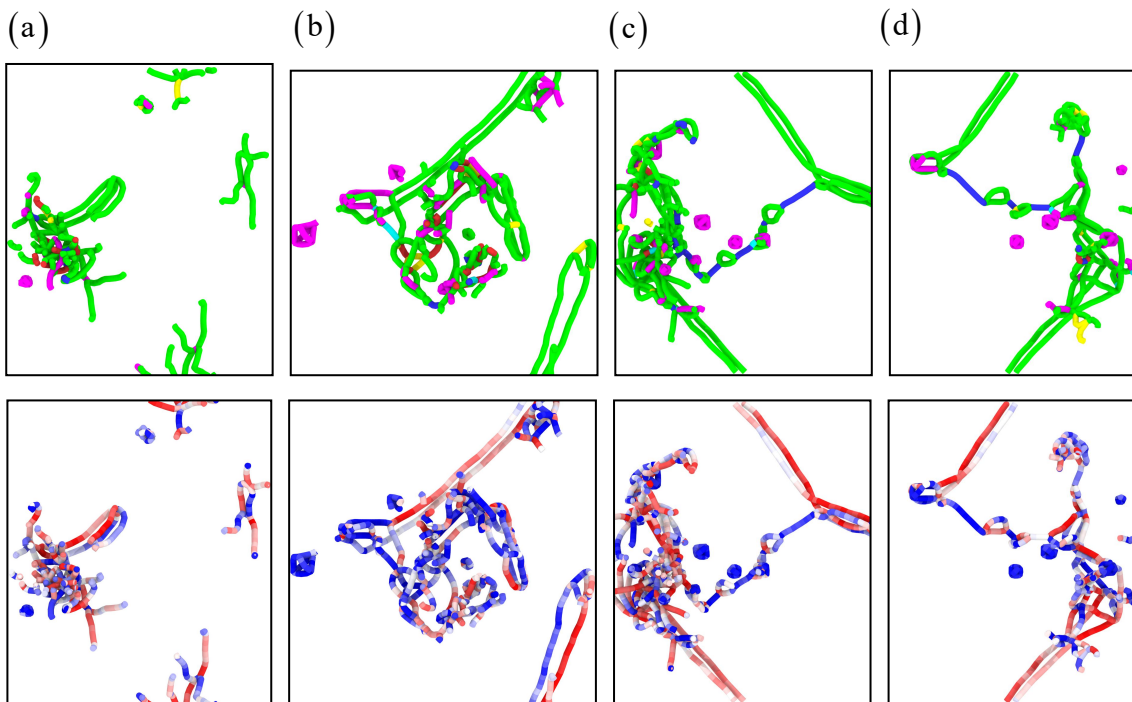

**Figure S5** The dislocation evolution with the scratching distance: (a) 10 nm, (b) 20 nm, (c) 30 nm, and (d) 36 nm. ( — green line),  $\langle 100 \rangle$  ( — pink line),  $\langle 110 \rangle$  ( — blue line), and other ( — red line).

red line) dislocations in the upper row. The blue lines stand for the edge dislocations, the red lines stand for screw dislocations, and other color lines stand for the mixed dislocations in the lower row.

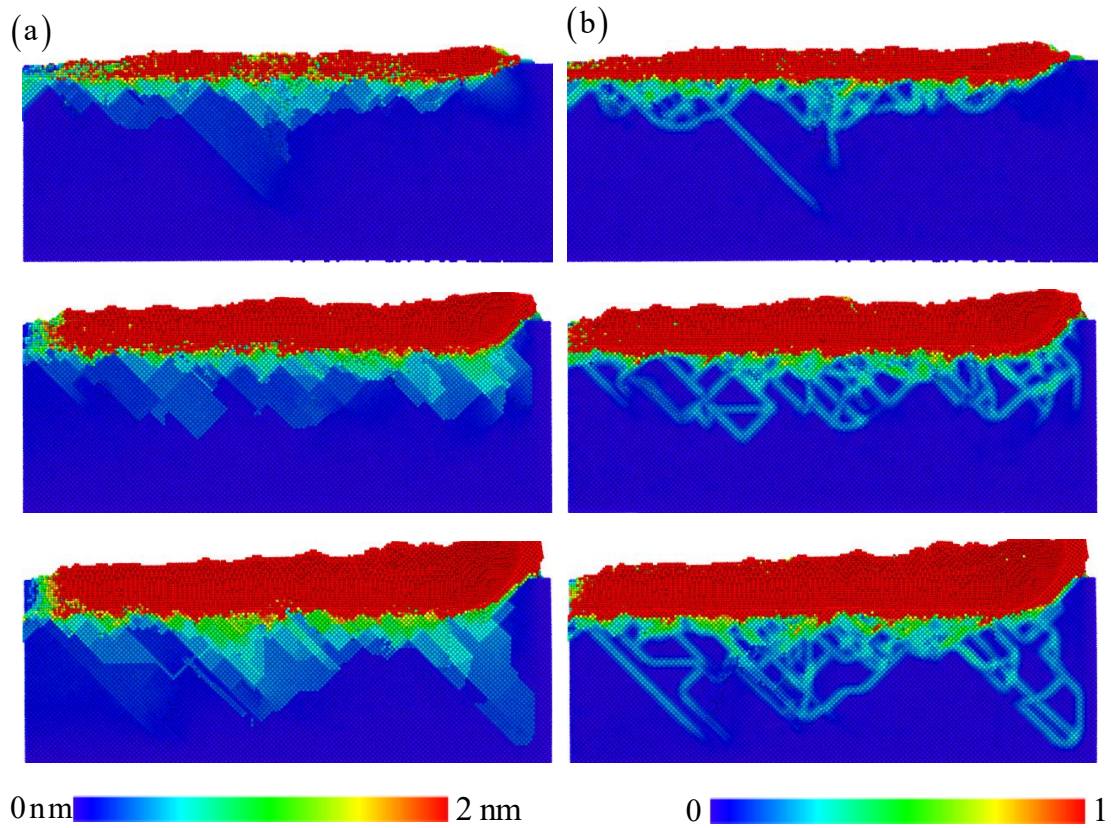

**Figure S6** The distribution of (a) displacement, and (b) shear strain for different scratching depths: 0.5 nm, 1.5 nm, and 2.0 nm in the pure Ni.

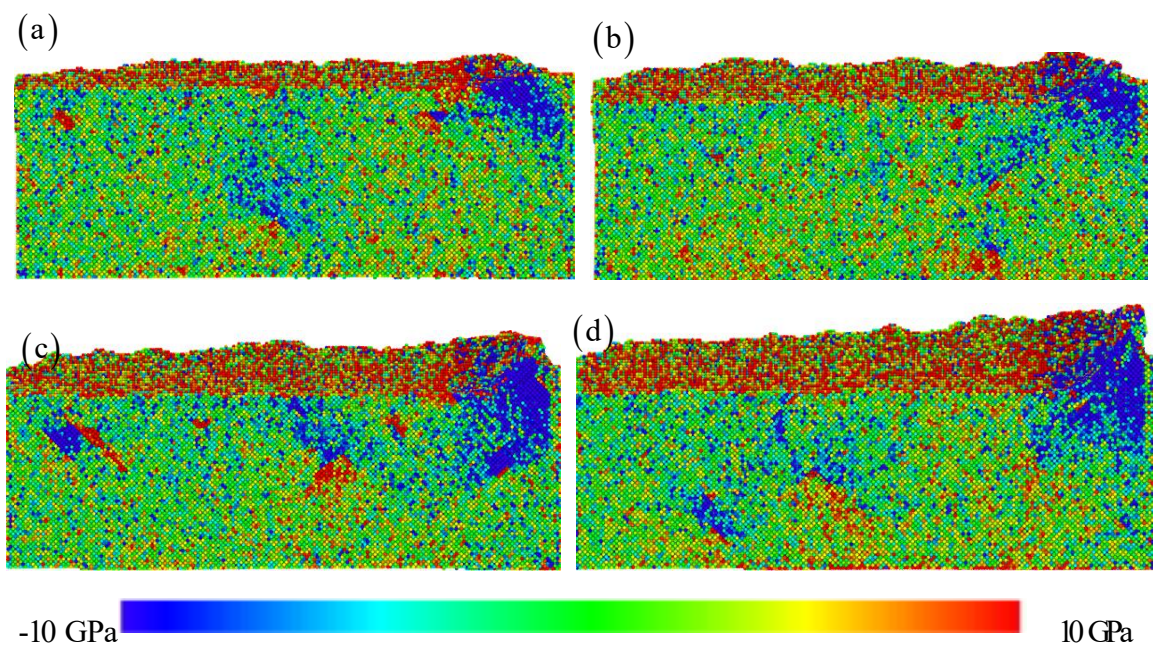

**Figure S7** The distribution of stress for different scratching depths: 0.5 nm, 1.0 nm, 1.5 nm, and 2.0 nm in the pure Ni.



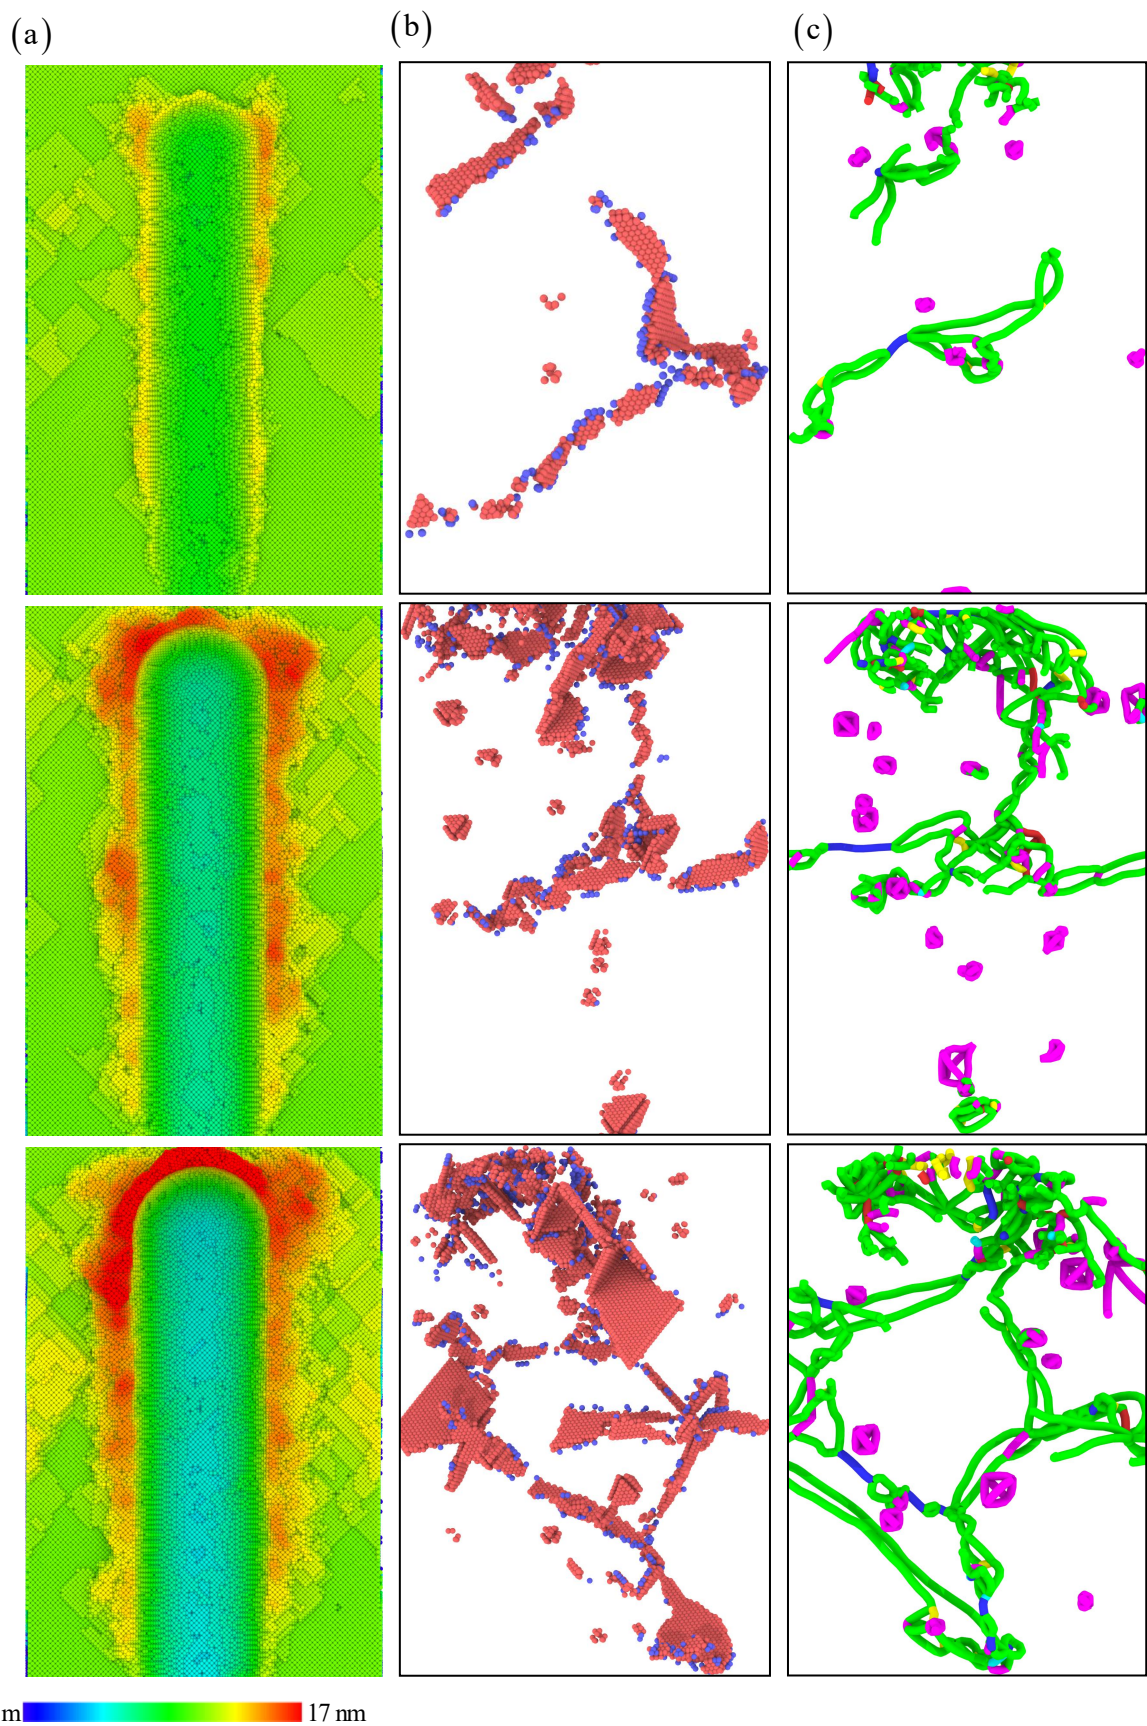

**Figure S8** The evolution of (a) surface morphology, (b) instantaneous microstructure and (c) dislocation for different scratching depths: 0.5 nm, 1.5 nm, and 2.0 nm in the pure Ni.
